# Supplementary material for: Bamboo Stems (Phyllostachys nigra variety henosis) Containing Polyphenol Mixtures Activate Nrf2 and Attenuate Phenylhydrazine-Induced Oxidative Stress and Liver Injury
Source: MDPI journal article supplement (doi:10.3390/nu11010114), 2019-01-08
Supplement: s1 [file s1]

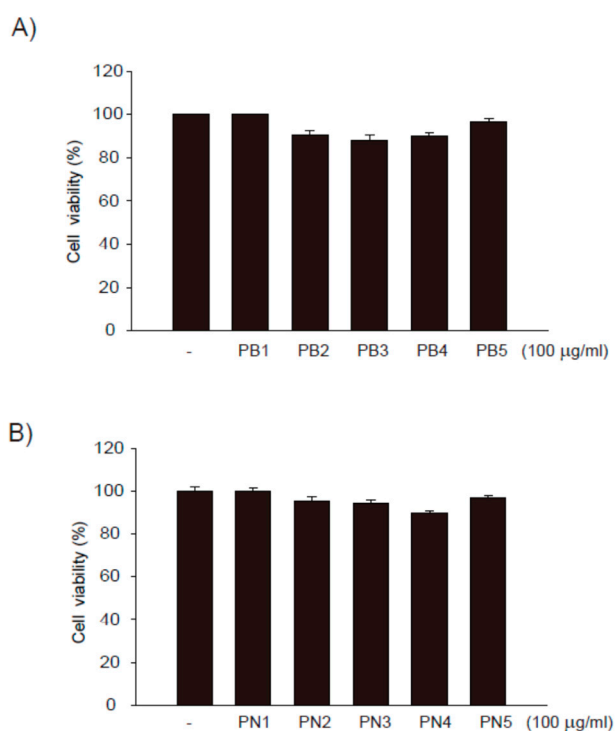

**Supplementary Figure 1. Cell viability due to *Phyllostachys bambusoides* (PB) and *Phyllostachys nigra* var. *henonis* (PN) extracts in HepG2 cells.**

**A and B**, HepG2 cells were treated with extracts of PB (PB1-5: 100 µg/mL) and PN (PN1-5: 100 µg/mL) for 24 h. Data represent the mean  $\pm$  S.D. of 3 separate experiments, where the statistical significance of differences between each treatment group and the vehicle-treated control are given.
